# Supplementary material for: PCSK9 Protein and rs562556 Polymorphism Are Associated With Arterial Plaques in Healthy Middle‐Aged Population: The STANISLAS Cohort
Source: PubMed Central journal article supplement — J Am Heart Assoc. 2020 Mar 25;9(7):e014758. doi: 10.1161/JAHA.119.014758 (PMC7428603; doi:10.1161/jaha.119.014758), 2020-03-25

# **Supplemental Material**

**Table S1. Characteristics of the study population (at visit 4) by the presence of carotid plaques at visit 4.**

| <b>Patients` characteristics at V4</b> | <b>No plaque</b> | <b>Plaque at V4</b> | <b>p-value</b> |
|----------------------------------------|------------------|---------------------|----------------|
| N. total =997                          | 794              | 203                 |                |
| Age (yr)                               | 58.7 ± 5.8       | 61.4 ± 5.2          | <0.001         |
| Male sex                               | 387 (48.7%)      | 122 (60.1%)         | 0.004          |
| BMI (Kg/m <sup>2</sup> )               | 26.9 ± 4.8       | 27.4 ± 4.8          | 0.16           |
| Waist circumference (cm)               | 92.6 ± 13.3      | 95.7 ± 13.6         | 0.003          |
| Smoking                                | 99 (12.5%)       | 29 (14.4%)          | 0.46           |
| SBP (mmHg)                             | 128.2 ± 15.5     | 134.4 ± 16.9        | <0.001         |
| DBP (mmHg)                             | 74.3 ± 8.8       | 74.4 ± 9.0          | 0.87           |
| Heart rate (bpm)                       | 63.5 ± 8.9       | 62.7 ± 10.5         | 0.28           |
| Diabetes                               | 57 (7.3%)        | 21 (10.7%)          | 0.27           |
| Glucose (g/L)                          | 0.9 ± 0.2        | 1.0 ± 0.2           | <0.001         |
| Hypertension history                   | 225 (28.4%)      | 76 (37.8%)          | 0.010          |
| Total cholesterol (g/L)                | 2.2 ± 0.4        | 2.2 ± 0.4           | 0.46           |
| HDL cholesterol (g/L)                  | 0.6 ± 0.1        | 0.6 ± 0.1           | 0.59           |
| LDL cholesterol (g/L)                  | 1.4 ± 0.3        | 1.4 ± 0.4           | 0.11           |
| Triglycerides (g/L)                    | 1.1 ± 0.8        | 1.2 ± 0.6           | 0.033          |
| Lipid lowering therapy                 | 181 (22.8%)      | 71 (35.0%)          | <0.001         |
| eGFR (ml/min)                          | 88.3 ± 12.0      | 89.1 ± 12.9         | 0.41           |
| Carotid stenosis 20-50%                | 0 (0.0%)         | 15 (100.0%)         | <0.001         |
| cIMT (µm)                              | 691 ± 138        | 722 ± 132           | 0.005          |
| PWV (m/s)                              | 9.0 ± 1.7        | 9.8 ± 2.1           | <0.001         |
| PCSK9 (NPX)                            | 2.9 ± 0.4        | 3.0 ± 0.4           | <0.001         |
| LDL receptor (NPX)                     | 5.5 ± 0.6        | 5.6 ± 0.5           | 0.016          |

BMI, body mass index; SBP, systolic blood pressure; DBP, diastolic blood pressure; eGFR, estimated glomerular filtration rate calculated by the CKD-EPI formula; LDL, low-density lipoprotein; cIMT, carotid intima-media thickness; PWV, pulse-wave velocity; PCSK9, proprotein convertase subtilisin/kexin type 9; NPX, Olink® log2 standardized units.

**Table S2. Factors associated with carotid artery plaque at visit 4.**

| <b>Variable</b>                                             | <b>OR (95%CI)</b> | <b>p-value</b> |
|-------------------------------------------------------------|-------------------|----------------|
| <b>“Best” clinical model</b>                                |                   |                |
| Age (per 5 yr)                                              | 1.48 (1.26-1.73)  | <0.001         |
| SBP (per 10 mmHg)                                           | 1.18 (1.07-1.30)  | 0.001          |
| Lipid-lowering therapy                                      | 1.39 (0.98-1.97)  | 0.062          |
| <b>PCSK9 plus LDLr on top of the “best” clinical model</b>  |                   |                |
| PCSK9 (NPX)                                                 | 1.66 (1.01-2.72)  | 0.045          |
| LDLr (NPX)                                                  | 1.12 (0.82-1.53)  | 0.48           |
| <b>PCSK9/LDLr ratio on top of the “best” clinical model</b> |                   |                |
| PCSK9/LDLr (ratio)                                          | 1.13 (0.89-1.43)  | 0.33           |

N =997; N. Plaque =203.

LDLc, low-density lipoprotein cholesterol; PCSK9, proprotein convertase subtilisin/kexin type 9; LDLr, LDL receptor; NPX, Olink® log2 standardized units.

**Table S3. Plaque at visit 4 in the “children”.**

| <b>Children at V1</b> | <b>No plaque</b> | <b>Plaque at V4</b> |
|-----------------------|------------------|---------------------|
| N. total =647         | 641 (99.1%)      | 6 (0.9%)            |

**Table S4. Association of PCSK9 and LDLr (visit 1 and visit 4) with IMT and PWV (at visit 4).**

| <b>Visit 1 (PCSK9 and LDLr)</b>                 |                       |                |
|-------------------------------------------------|-----------------------|----------------|
| <b>IMT above the 90<sup>th</sup> percentile</b> | <b>OR (95%CI)</b>     | <b>p-value</b> |
| PCSK9 (NPX)                                     | 1.03 (0.67-1.61)      | 0.87           |
| LDLr (NPX)                                      | 1.11 (0.84-1.47)      | 0.45           |
| <b>IMT (mm) continuous</b>                      | <b>Coef. (95%CI)</b>  | <b>p-value</b> |
| PCSK9 (NPX)                                     | 16.1 (-10.7 to +42.8) | 0.24           |
| LDLr (NPX)                                      | 11.8 (-5.2 to +28.7)  | 0.18           |
| <b>PWV above the 90<sup>th</sup> percentile</b> | <b>OR (95%CI)</b>     | <b>p-value</b> |
| PCSK9 (NPX)                                     | 1.01 (0.46-2.20)      | 0.98           |
| LDLr (NPX)                                      | 1.23 (0.75-2.01)      | 0.41           |
| <b>PWV (m/s) continuous</b>                     | <b>Coef. (95%CI)</b>  | <b>p-value</b> |
| PCSK9 (NPX)                                     | -0.1 (-0.4 to +0.3)   | 0.60           |
| LDLr (NPX)                                      | 0.4 (+0.1 to +0.6)    | 0.002          |
| <b>Visit 4 (PCSK9 and LDLr)</b>                 |                       |                |
| <b>IMT above the 90<sup>th</sup> percentile</b> | <b>OR (95%CI)</b>     | <b>p-value</b> |
| PCSK9 (NPX)                                     | 0.87 (0.58-1.30)      | 0.51           |
| LDLr (NPX)                                      | 1.32 (1.00-1.73)      | 0.042          |
| <b>IMT (mm) continuous</b>                      | <b>Coef. (95%CI)</b>  | <b>p-value</b> |
| PCSK9 (NPX)                                     | -2.9 (-27.4 to +21.5) | 0.81           |
| LDLr (NPX)                                      | 20.9 (+4.5 to +37.2)  | 0.012          |
| <b>PWV above the 90<sup>th</sup> percentile</b> | <b>OR (95%CI)</b>     | <b>p-value</b> |
| PCSK9 (NPX)                                     | 1.09 (0.55-2.18)      | 0.79           |
| LDLr (NPX)                                      | 1.17 (0.74-1.84)      | 0.51           |
| <b>PWV (m/s) continuous</b>                     | <b>Coef. (95%CI)</b>  | <b>p-value</b> |
| PCSK9 (NPX)                                     | 0.1 (-0.3 to +0.3)    | 0.92           |
| LDLr (NPX)                                      | 0.1 (-0.1 to +0.3)    | 0.27           |

Model adjusted on age, sex, smoking and LDLc.

**Table S5. Association between presence of plaques and PCSK9 polymorphisms (n=949).**

| <b>id</b>   | <b>Allele 1</b> | <b>Allele 2</b> | <b>freqA2</b> | <b>beta</b> | <b>sd</b> | <b>p</b> | <b>BH</b> |
|-------------|-----------------|-----------------|---------------|-------------|-----------|----------|-----------|
| rs2479394   | G               | A               | 0.702         | 0.124       | 0.132     | 0.348    | 0.566     |
| rs11588151  | G               | A               | 0.778         | 0.151       | 0.151     | 0.318    | 0.566     |
| rs11206510  | C               | T               | 0.795         | 0.256       | 0.157     | 0.103    | 0.269     |
| rs17192725  | A               | G               | 0.900         | 0.013       | 0.200     | 0.950    | 0.950     |
| rs2182833   | G               | A               | 0.800         | -0.141      | 0.150     | 0.348    | 0.566     |
| rs2479409   | G               | A               | 0.655         | -0.281      | 0.125     | 0.025    | 0.130     |
| rs11591147  | T               | G               | 0.985         | 0.120       | 0.513     | 0.814    | 0.847     |
| rs11583680  | T               | C               | 0.856         | 0.409       | 0.190     | 0.032    | 0.137     |
| rs499718    | T               | C               | 0.815         | 0.101       | 0.159     | 0.524    | 0.632     |
| rs28385708  | T               | C               | 0.932         | 0.163       | 0.245     | 0.507    | 0.632     |
| rs41294821  | T               | C               | 0.990         | -0.559      | 0.545     | 0.305    | 0.566     |
| rs7552841   | T               | C               | 0.600         | 0.037       | 0.124     | 0.768    | 0.832     |
| rs58255540  | G               | A               | 0.948         | -0.209      | 0.255     | 0.412    | 0.630     |
| rs634272    | T               | C               | 0.741         | 0.412       | 0.147     | 0.005    | 0.032     |
| rs11808052  | T               | C               | 0.948         | -0.134      | 0.259     | 0.604    | 0.683     |
| rs540796    | A               | G               | 0.838         | 0.578       | 0.188     | 0.002    | 0.024     |
| rs562556    | G               | A               | 0.838         | 0.584       | 0.188     | 0.002    | 0.024     |
| rs114162366 | A               | G               | 0.981         | -0.301      | 0.403     | 0.455    | 0.632     |
| rs631220    | A               | G               | 0.838         | 0.562       | 0.187     | 0.003    | 0.024     |
| rs505151    | G               | A               | 0.968         | 0.248       | 0.377     | 0.510    | 0.632     |
| rs41294827  | T               | G               | 0.973         | -0.653      | 0.333     | 0.050    | 0.143     |
| rs77011887  | T               | C               | 0.979         | -0.443      | 0.386     | 0.251    | 0.544     |
| rs77868073  | C               | T               | 0.974         | -0.673      | 0.334     | 0.044    | 0.142     |
| rs487230    | A               | G               | 0.784         | 0.327       | 0.159     | 0.039    | 0.142     |
| rs114527615 | A               | G               | 0.980         | 0.289       | 0.466     | 0.535    | 0.632     |
| rs17111584  | C               | T               | 0.968         | -0.487      | 0.309     | 0.114    | 0.271     |

**Table S6. Crude odd ratios for association between plaques at V4 and genotype at rs562556.**

|          | Plaques<br>(n=184) | No plaques<br>(n=718) | OR (95%CI)<br>(risk per A allele) | P trend   |
|----------|--------------------|-----------------------|-----------------------------------|-----------|
| Rs562556 |                    |                       |                                   |           |
| GG       | 0                  | 24                    |                                   |           |
| GA       | 41                 | 201                   | 1.67 (1.17-2.38)                  | P = 0.004 |
| AA       | 143                | 493                   |                                   |           |

**Table S7. Association between *PCSK9* polymorphisms and circulating LDL at visit 4 (n=895).**

| <b>id</b>   | <b>Allele 1</b> | <b>Allele 2</b> | <b>freqA2</b> | <b>beta</b> | <b>sd</b> | <b>p</b> | <b>BH</b> |
|-------------|-----------------|-----------------|---------------|-------------|-----------|----------|-----------|
| rs2479394   | G               | A               | 0.703         | -0.019      | 0.017     | 0.273    | 0.671     |
| rs11588151  | G               | A               | 0.777         | -0.010      | 0.019     | 0.617    | 0.895     |
| rs11206510  | C               | T               | 0.794         | -0.017      | 0.020     | 0.382    | 0.671     |
| rs17192725  | A               | G               | 0.899         | -0.013      | 0.026     | 0.619    | 0.895     |
| rs2182833   | G               | A               | 0.800         | -0.016      | 0.020     | 0.416    | 0.675     |
| rs2479409   | G               | A               | 0.654         | -0.006      | 0.017     | 0.703    | 0.918     |
| rs11591147  | T               | G               | 0.985         | 0.080       | 0.065     | 0.218    | 0.671     |
| rs11583680  | T               | C               | 0.856         | -0.025      | 0.023     | 0.269    | 0.671     |
| rs499718    | T               | C               | 0.815         | -0.007      | 0.020     | 0.747    | 0.925     |
| rs28385708  | T               | C               | 0.931         | -0.027      | 0.031     | 0.387    | 0.671     |
| rs41294821  | T               | C               | 0.990         | -0.004      | 0.079     | 0.964    | 0.964     |
| rs7552841   | T               | C               | 0.601         | -0.018      | 0.016     | 0.269    | 0.671     |
| rs58255540  | G               | A               | 0.948         | 0.032       | 0.035     | 0.358    | 0.671     |
| rs634272    | T               | C               | 0.741         | -0.007      | 0.018     | 0.706    | 0.918     |
| rs11808052  | T               | C               | 0.948         | 0.033       | 0.035     | 0.343    | 0.671     |
| rs540796    | A               | G               | 0.837         | 0.053       | 0.021     | 0.012    | 0.088     |
| rs562556    | G               | A               | 0.837         | 0.052       | 0.021     | 0.014    | 0.088     |
| rs114162366 | A               | G               | 0.980         | -0.005      | 0.057     | 0.929    | 0.964     |
| rs631220    | A               | G               | 0.838         | 0.053       | 0.021     | 0.011    | 0.088     |
| rs505151    | G               | A               | 0.968         | -0.006      | 0.045     | 0.888    | 0.964     |
| rs41294827  | T               | G               | 0.973         | 0.069       | 0.049     | 0.161    | 0.671     |
| rs77011887  | T               | C               | 0.979         | -0.005      | 0.055     | 0.930    | 0.964     |
| rs77868073  | C               | T               | 0.974         | 0.063       | 0.049     | 0.202    | 0.671     |
| rs487230    | A               | G               | 0.783         | 0.048       | 0.019     | 0.013    | 0.088     |
| rs114527615 | A               | G               | 0.980         | -0.013      | 0.056     | 0.815    | 0.963     |
| rs17111584  | C               | T               | 0.968         | 0.042       | 0.044     | 0.340    | 0.671     |



**Table S8. Association between *PCSK9* polymorphisms and circulating LDL at visit 1 (n=861).**

| <b>id</b>   | <b>Allele 1</b> | <b>Allele 2</b> | <b>freqA2</b> | <b>beta</b> | <b>sd</b> | <b>p</b> | <b>BH</b> |
|-------------|-----------------|-----------------|---------------|-------------|-----------|----------|-----------|
| rs2479394   | G               | A               | 0.699         | -0.011      | 0.018     | 0.534    | 0.816     |
| rs11588151  | G               | A               | 0.776         | 0.050       | 0.020     | 0.015    | 0.077     |
| rs11206510  | C               | T               | 0.793         | 0.033       | 0.021     | 0.113    | 0.327     |
| rs17192725  | A               | G               | 0.899         | -0.056      | 0.028     | 0.042    | 0.156     |
| rs2182833   | G               | A               | 0.797         | -0.025      | 0.021     | 0.248    | 0.538     |
| rs2479409   | G               | A               | 0.653         | -0.034      | 0.018     | 0.054    | 0.176     |
| rs11591147  | T               | G               | 0.985         | 0.190       | 0.068     | 0.005    | 0.077     |
| rs11583680  | T               | C               | 0.856         | 0.012       | 0.024     | 0.605    | 0.828     |
| rs499718    | T               | C               | 0.814         | -0.006      | 0.021     | 0.778    | 0.963     |
| rs28385708  | T               | C               | 0.932         | 0.007       | 0.033     | 0.824    | 0.974     |
| rs41294821  | T               | C               | 0.990         | 0.025       | 0.084     | 0.765    | 0.963     |
| rs7552841   | T               | C               | 0.598         | -0.024      | 0.017     | 0.155    | 0.393     |
| rs58255540  | G               | A               | 0.948         | 0.029       | 0.037     | 0.439    | 0.761     |
| rs634272    | T               | C               | 0.744         | 0.021       | 0.019     | 0.274    | 0.549     |
| rs11808052  | T               | C               | 0.948         | 0.030       | 0.037     | 0.427    | 0.761     |
| rs540796    | A               | G               | 0.838         | 0.057       | 0.022     | 0.011    | 0.077     |
| rs562556    | G               | A               | 0.837         | 0.056       | 0.022     | 0.012    | 0.077     |
| rs114162366 | A               | G               | 0.983         | 0.000       | 0.064     | 0.996    | 0.996     |
| rs631220    | A               | G               | 0.839         | 0.059       | 0.022     | 0.009    | 0.077     |
| rs505151    | G               | A               | 0.969         | -0.112      | 0.048     | 0.021    | 0.090     |
| rs41294827  | T               | G               | 0.974         | 0.007       | 0.053     | 0.897    | 0.996     |
| rs77011887  | T               | C               | 0.979         | -0.032      | 0.059     | 0.589    | 0.828     |
| rs77868073  | C               | T               | 0.975         | -0.001      | 0.054     | 0.984    | 0.996     |
| rs487230    | A               | G               | 0.787         | 0.028       | 0.020     | 0.166    | 0.393     |
| rs114527615 | A               | G               | 0.980         | 0.039       | 0.059     | 0.511    | 0.816     |
| rs17111584  | C               | T               | 0.971         | -0.004      | 0.050     | 0.935    | 0.996     |

**Table S9. Association between *PCSK9* polymorphisms and circulating *PCSK9* at visit 1 (n=894).**

| <b>id</b>   | <b>Allele 1</b> | <b>Allele 2</b> | <b>freqA2</b> | <b>beta</b> | <b>sd</b> | <b>p</b> | <b>BH</b> |
|-------------|-----------------|-----------------|---------------|-------------|-----------|----------|-----------|
| rs2479394   | G               | A               | 0.702         | -0.026      | 0.019     | 1.7E-01  | 2.9E-01   |
| rs11588151  | G               | A               | 0.777         | 0.061       | 0.021     | 3.8E-03  | 9.5E-03   |
| rs11206510  | C               | T               | 0.794         | 0.061       | 0.021     | 4.4E-03  | 9.5E-03   |
| rs17192725  | A               | G               | 0.899         | -0.038      | 0.028     | 1.8E-01  | 2.9E-01   |
| rs2182833   | G               | A               | 0.800         | -0.077      | 0.022     | 4.6E-04  | 1.3E-03   |
| rs2479409   | G               | A               | 0.655         | -0.048      | 0.018     | 7.7E-03  | 1.5E-02   |
| rs11591147  | T               | G               | 0.985         | 0.326       | 0.070     | 3.4E-06  | 1.7E-05   |
| rs11583680  | T               | C               | 0.855         | 0.120       | 0.024     | 8.8E-07  | 1.5E-05   |
| rs499718    | T               | C               | 0.814         | 0.087       | 0.022     | 7.7E-05  | 2.5E-04   |
| rs28385708  | T               | C               | 0.931         | -0.023      | 0.034     | 5.1E-01  | 6.0E-01   |
| rs41294821  | T               | C               | 0.990         | 0.053       | 0.086     | 5.4E-01  | 6.0E-01   |
| rs7552841   | T               | C               | 0.601         | -0.050      | 0.017     | 4.2E-03  | 9.5E-03   |
| rs58255540  | G               | A               | 0.949         | 0.027       | 0.038     | 4.9E-01  | 6.0E-01   |
| rs634272    | T               | C               | 0.740         | 0.089       | 0.019     | 4.0E-06  | 1.7E-05   |
| rs11808052  | T               | C               | 0.949         | 0.031       | 0.038     | 4.2E-01  | 5.8E-01   |
| rs540796    | A               | G               | 0.837         | 0.110       | 0.023     | 1.8E-06  | 1.5E-05   |
| rs562556    | G               | A               | 0.837         | 0.110       | 0.023     | 1.7E-06  | 1.5E-05   |
| rs114162366 | A               | G               | 0.980         | -0.053      | 0.062     | 4.0E-01  | 5.7E-01   |
| rs631220    | A               | G               | 0.837         | 0.108       | 0.023     | 2.5E-06  | 1.6E-05   |
| rs505151    | G               | A               | 0.968         | -0.063      | 0.049     | 2.1E-01  | 3.1E-01   |
| rs41294827  | T               | G               | 0.973         | 0.023       | 0.054     | 6.7E-01  | 7.2E-01   |
| rs77011887  | T               | C               | 0.979         | -0.042      | 0.060     | 4.8E-01  | 6.0E-01   |
| rs77868073  | C               | T               | 0.974         | 0.021       | 0.054     | 7.0E-01  | 7.3E-01   |
| rs487230    | A               | G               | 0.783         | 0.083       | 0.021     | 7.3E-05  | 2.5E-04   |
| rs114527615 | A               | G               | 0.980         | 0.120       | 0.061     | 5.1E-02  | 9.5E-02   |
| rs17111584  | C               | T               | 0.968         | 0.002       | 0.049     | 9.7E-01  | 9.7E-01   |

**Table S10. Association between *PCSK9* polymorphisms and circulating *PCSK9* at visit 4 (n=897).**

| <b>id</b>   | <b>A1</b> | <b>A2</b> | <b>freqA2</b> | <b>beta</b> | <b>sd</b> | <b>p</b> | <b>BH</b> |
|-------------|-----------|-----------|---------------|-------------|-----------|----------|-----------|
| rs2479394   | G         | A         | 0.702         | -0.016      | 0.018     | 3.94E-01 | 5.12E-01  |
| rs11588151  | G         | A         | 0.778         | 0.079       | 0.021     | 1.28E-04 | 3.70E-04  |
| rs11206510  | C         | T         | 0.795         | 0.101       | 0.021     | 1.62E-06 | 1.05E-05  |
| rs17192725  | A         | G         | 0.900         | -0.031      | 0.028     | 2.68E-01 | 3.69E-01  |
| rs2182833   | G         | A         | 0.800         | -0.052      | 0.022     | 1.59E-02 | 2.96E-02  |
| rs2479409   | G         | A         | 0.655         | -0.065      | 0.018     | 2.63E-04 | 6.84E-04  |
| rs11591147  | T         | G         | 0.985         | 0.429       | 0.068     | 5.46E-10 | 1.42E-08  |
| rs11583680  | T         | C         | 0.856         | 0.143       | 0.024     | 3.75E-09 | 4.88E-08  |
| rs499718    | T         | C         | 0.815         | 0.084       | 0.022     | 1.13E-04 | 3.67E-04  |
| rs28385708  | T         | C         | 0.931         | 0.024       | 0.033     | 4.67E-01 | 5.78E-01  |
| rs41294821  | T         | C         | 0.990         | 0.094       | 0.085     | 2.70E-01 | 3.69E-01  |
| rs7552841   | T         | C         | 0.599         | -0.053      | 0.017     | 2.23E-03 | 5.26E-03  |
| rs58255540  | G         | A         | 0.949         | 0.091       | 0.038     | 1.78E-02 | 3.08E-02  |
| rs634272    | T         | C         | 0.741         | 0.096       | 0.019     | 5.09E-07 | 4.41E-06  |
| rs11808052  | T         | C         | 0.949         | 0.090       | 0.038     | 2.00E-02 | 3.25E-02  |
| rs540796    | A         | G         | 0.838         | 0.103       | 0.023     | 6.34E-06 | 2.75E-05  |
| rs562556    | G         | A         | 0.838         | 0.105       | 0.023     | 3.93E-06 | 2.04E-05  |
| rs114162366 | A         | G         | 0.980         | 0.022       | 0.062     | 7.26E-01 | 7.55E-01  |
| rs631220    | A         | G         | 0.839         | 0.102       | 0.023     | 7.68E-06 | 2.85E-05  |
| rs505151    | G         | A         | 0.968         | -0.139      | 0.049     | 4.51E-03 | 9.76E-03  |
| rs41294827  | T         | G         | 0.973         | 0.031       | 0.053     | 5.52E-01 | 6.24E-01  |
| rs77011887  | T         | C         | 0.979         | 0.015       | 0.059     | 7.98E-01 | 7.98E-01  |
| rs77868073  | C         | T         | 0.974         | 0.035       | 0.053     | 5.16E-01 | 6.09E-01  |
| rs487230    | A         | G         | 0.784         | 0.058       | 0.021     | 5.23E-03 | 1.05E-02  |
| rs114527615 | A         | G         | 0.980         | 0.068       | 0.061     | 2.63E-01 | 3.69E-01  |
| rs17111584  | C         | T         | 0.968         | 0.023       | 0.048     | 6.35E-01 | 6.88E-01  |

**Table S11. Partial correlation coefficients.**

| <b>Variable</b>           | <b>Partial correlation</b> | <b>P-value</b> |
|---------------------------|----------------------------|----------------|
| <b>PCSK9 levels at V1</b> |                            |                |
| Age at V1                 | -5.2%                      | 0.12           |
| Smoking at V1             | -0.1%                      | 0.77           |
| LDLc at V1                | 15.0%                      | <0.001         |
| LDLr at V1                | 37.6%                      | <0.001         |
| rs562556                  | 16.0%                      | <0.001         |
| <b>PCSK9 levels at V4</b> |                            |                |
| Age at V4                 | -2.3%                      | 0.49           |
| SBP at V4                 | -1.5%                      | 0.65           |
| Statin at V4              | 30.0%                      | <0.001         |
| LDLr at V4                | 36.5%                      | <0.001         |
| rs562556                  | 16.5%                      | <0.001         |

**Figure S1. Distribution of the Stanislas cohort population according to age.**

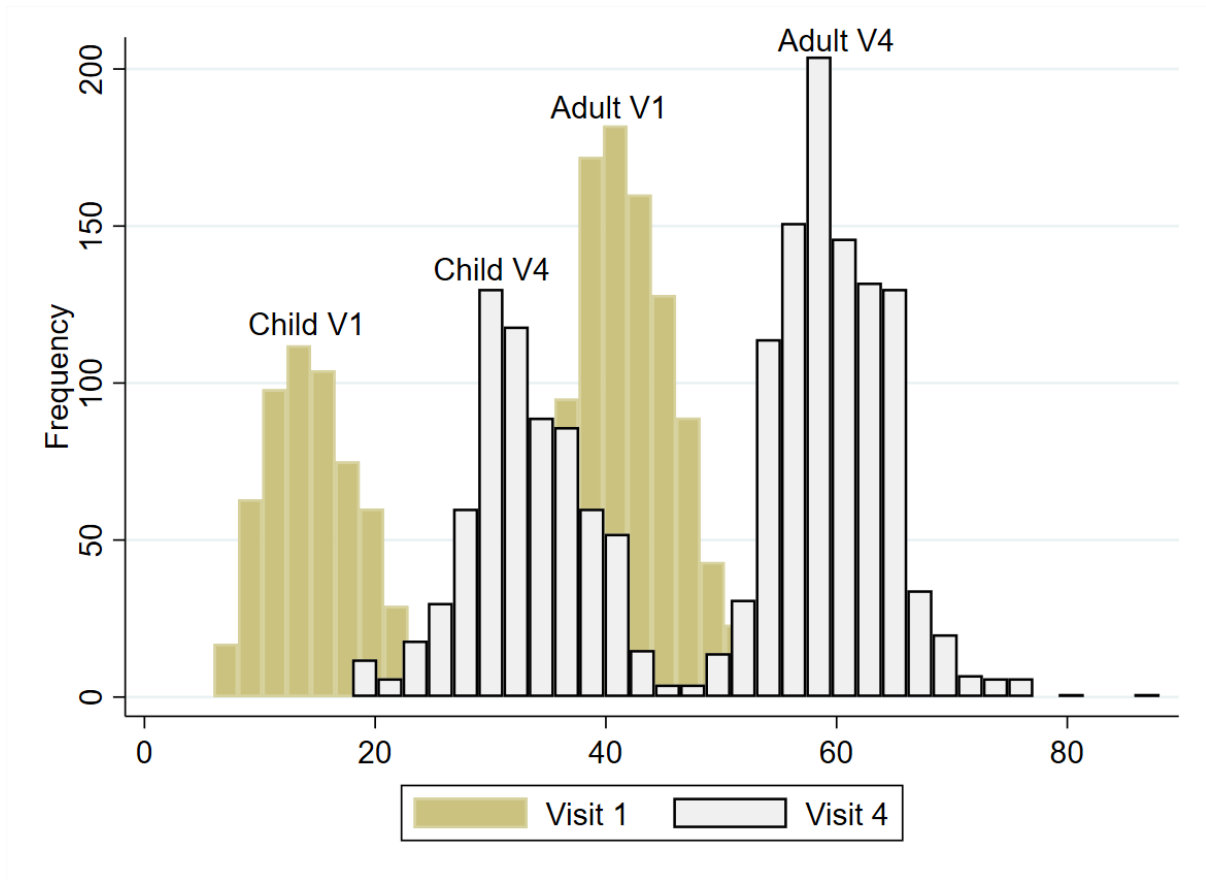

Supplement: JAH3-9-e014758-s001.pdf [file JAH3-9-e014758-s001.pdf]
